# Supplementary material for: Sensitivity of the WRF-Chem v4.4 ozone, formaldehyde, and precursor simulations to multiple bottom-up emission inventories over East Asia during the KORUS-AQ 2016 field campaign
Source: Copernicus journal article supplement (doi:10.5194/gmd-2023-132), 2023-08-29
Supplement: Supplementary file 1 [file gmd-2023-132-supplement.pdf]

# **Sensitivity of the WRF-Chem v4.4 ozone, formaldehyde, and precursor simulations to multiple bottom-up emission inventories over East Asia during the KORUS-AQ 2016 field campaign**

## **Supporting Information**

Kyoung-Min Kim<sup>1</sup>, Si-Wan Kim<sup>2\*</sup>, Seunghwan Seo<sup>1</sup>, Donald R. Blake<sup>3</sup>, Seogju Cho<sup>4</sup>, James H. Crawford<sup>5</sup>, Louisa Emmons<sup>6</sup>, Alan Fried<sup>7</sup>, Jay R. Herman<sup>8,9</sup>, Jinkyu Hong<sup>1</sup>, Jinsang Jung<sup>10</sup>, Gabriele Pfister<sup>6</sup>, Andrew J. Weinheimer<sup>6</sup>, Jung-Hun Woo<sup>11</sup>, and Qiang Zhang<sup>12</sup>

<sup>1</sup>Department of Atmospheric Sciences, Yonsei University, Seoul, South Korea

<sup>2</sup>Irreversible Climate Change Research Center, Yonsei University, Seoul, South Korea

<sup>3</sup>Department of Chemistry, University of California at Irvine, Irvine, CA, US

<sup>4</sup>Seoul Metropolitan Government Research Institute of Public Health and Environment, Gyeonggi-do, South Korea

<sup>5</sup>NASA Langley Research Center, Hampton, VA, US

<sup>6</sup>National Center for Atmospheric Research, Boulder, CO, US

<sup>7</sup>Institute of Arctic and Alpine Research, University of Colorado, Boulder, CO, US

<sup>8</sup>NASA Goddard Space Flight Center, Greenbelt, MD, US

<sup>9</sup>University of Maryland Baltimore County, Baltimore, MD, USA

<sup>10</sup>Korea Research Institute of Standards and Science, Daejeon, South Korea

<sup>11</sup>Department of Advanced Technology Fusion, Konkuk University, Seoul, South Korea

<sup>12</sup>Department of Earth System Science, Tsinghua University, Beijing, China

\*Corresponding author: [siwan.kim@yonsei.ac.kr](mailto:siwan.kim@yonsei.ac.kr)

The document includes Tables S1-S11 and Figures S1-S9(end).

## Table list

Table S1. The physics and chemistry schemes that are used in this study

Table S2. The list of RACM species.

Table S3. The area total emissions in Eastern China (27.7-40°N, 115-123°E), South Korea (34.5-38°N, 126-130°E), and Seoul Metropolitan Area (SMA: 37.2-37.8°N, 126.5-127.3°E) for each emission data set in May.

Table S4. The chemical species of anthropogenic emissions used in RACM chemistry option and their mapping formulas from MOZART chemistry option that is the input format of anthro\_emiss program

Table S5. Comparison of surface meteorological variables from SYNOP and WRF-Chem for the KORUS-AQ campaign period. N is the number of samples. R is correlation coefficient. RMSE is root-mean-square-error.

Table S6. The mapping table from WAS to RACM VOC based on Lu et al., 2013.

Table S7. Comparison of the aircraft-based 1-minute-interval O<sub>3</sub>, NO<sub>2</sub>, CO, HCHO, TOL, XYL, ETE, and ISO observations with EDV2, EDV3, and KOV5 in SMA under 2 km height (unit = ppb). N is the number of samples. R is correlation coefficient. RMSE is root-mean-square-error.

Table S8. Comparison of the aircraft-based 1-minute-interval O<sub>3</sub>, NO<sub>2</sub>, CO, HCHO, TOL, XYL, ETE, and ISO observations with EDV2, EDV3, and KOV5 in the Chungnam region under 2 km height (unit = ppb). N is the number of samples. R is correlation coefficient. RMSE is root-mean-square-error.

Table S9. Comparison of the aircraft-based 1-minute-interval O<sub>3</sub>, NO<sub>2</sub>, CO, and HCHO observations with EDV2, EDV3, and KOV5 in each case distinguished by Chinese contribution to O<sub>3</sub> concentration under 2 km height (unit = ppb). N is the number of samples. R is correlation coefficient. RMSE is root-mean-square-error.

Table S10. Comparison of the aircraft-based 1-minute-interval TOL, XYL, ETE, and ISO observations with EDV2, EDV3, and KOV5 in each case distinguished by Chinese contribution to O<sub>3</sub> concentration under 2 km height. TOL, XYL, ETE, and ISO are defined in regional atmospheric chemical model (RACM) and compared with WAS based on Table S5 (unit = ppb). N is the number of samples. R is correlation coefficient. RMSE is root-mean-square-error.

Table S11. Comparison of the aircraft-based 1-minute-interval O<sub>3</sub>, NO<sub>2</sub>, CO, HCHO, TOL, XYL, ETE, and ISO observations with EDV3\_Ch2 and EDV3\_ChKo2 in each case. The sampling number (N), mean, mean bias compared to DC-8 observations, standard deviations ( $\sigma$ ), and correlation coefficient (R) with observations are presented (unit = ppb).

## Figure list

Figure S1. Diurnal emission factors of VOC and NO<sub>x</sub>.

Figure S2. Averaged surface temperature (unit: °C) and relative humidity (unit: %) from (a, d) ground-based observations (SYNOP) and (b, e) the weather research and forecast (WRF) model coupled with chemistry (WRF-Chem) from 1st May to 10th June for each station and countries. The differences and correlation coefficients between averaged observations and WRF-Chem are shown (c, f).

Figure S3. Comparison of PBL heights derived from the ceilometer at Yonsei University (37.564°N, 126.935°E) with the WRF-Chem results during the KORUS-AQ campaign period: (a) time series of planetary boundary layer height from ceilometer and WRF-Chem (unit = m), (b) scatter plot of which x axis is ceilometer and y axis is WRF-Chem PBL height, (c) comparison of diurnal variations of PBL heights from ceilometer (grey) and WRF-Chem (red) with box whisker plot.

Figure S4. Correlation coefficient (R) between observed and simulated (a-c) MDA8 O<sub>3</sub> and (d-f) hourly O<sub>3</sub> with (a, d) EDV2, (b, e) EDV3, and (c, f) KOV5 emissions. The observation sites with R greater than 0.6 are indicated by a black circle.

Figure S5. (a-c) Simulated surface HCHO to NO<sub>2</sub> ratio (FNR) and (d-f) HCHO concentrations with (a, d) EDV2, (b, e) EDV3, and (c, f) KOV5 emissions for 14-16 LST. FNR greater than 1 is marked with black circles. The simulated FNR and HCHO are linearly interpolated to ground-based observation sites.

Figure S6. The DC-8 flight tracks on the 22nd May and 5th June.

Figure S7. The DC-8 flight tracks on the 4th, 20<sup>th</sup> May and 2nd, 3rd June (Local case).

Figure S8. The DC-8 flight tracks on the 22nd, 27th, 31st May (Transport case).

Figure S9. The contribution of Chinese emissions (%) to daily surface O<sub>3</sub> concentrations at Olympic Park obtained from the EDV3 simulations with/without Chinese anthropogenic emissions.

**Table S1.** The physics and chemistry schemes that are used in this study

| <b>Physics</b>                 | <b>Scheme</b>                   | <b>Reference</b>                               |
|--------------------------------|---------------------------------|------------------------------------------------|
| Planetary Boundary Layer (PBL) | Yonsei University Scheme (YSU)  | Hong and Noh, 2006                             |
| Land surface                   | Unified Noah Land Surface Model | Tewari et al., 2004                            |
| Microphysics                   | Purdue Lin Scheme               | Chen and Sun, 2002                             |
| Cumulus parameterization       | Grell 3D Ensemble               | Grell, 1993<br>Grell and Devenyi, 2002         |
| <b>Chemistry</b>               | <b>Scheme</b>                   | <b>Reference</b>                               |
| Photolysis                     | Madronich                       | Madronich, 1987                                |
| Gas-phase chemistry            | NOAA/ESRL RACM                  | Stokwell et al., 1997                          |
| Aerosols                       | MADE/VBS                        | Ackermann et al., 1998<br>Ahmadov et al., 2012 |

**Table S2. The list of RACM species.**

| <b>Species</b> | <b>Definition</b>                                                                                                                                              |
|----------------|----------------------------------------------------------------------------------------------------------------------------------------------------------------|
| <b>ISO</b>     | Isoprene                                                                                                                                                       |
| <b>SO2</b>     | Sulfur dioxide                                                                                                                                                 |
| <b>NO</b>      | Nitric oxide                                                                                                                                                   |
| <b>NO2</b>     | Nitrogen dioxide                                                                                                                                               |
| <b>CO</b>      | Carbon monoxide                                                                                                                                                |
| <b>ETH</b>     | Ethane                                                                                                                                                         |
| <b>HC3</b>     | Alkanes, alcohols, esters, and alkynes with HO rate constant(298 K, 1 atm) less than $3.4 \times 10^{-12} \text{ cm}^3 \text{ s}^{-1}$                         |
| <b>HC5</b>     | Alkanes, alcohols, esters, and alkynes with HO rate constant(298K , 1 atm) between $3.4 \times 10^{-12}$ and $6.8 \times 10^{-12} \text{ cm}^3 \text{ s}^{-1}$ |
| <b>HC8</b>     | Alkanes, alcohols, esters, and alkynes with HO rate constant(298 K, 1 atm) greater than $6.8 \times 10^{-12} \text{ cm}^3 \text{ s}^{-1}$                      |
| <b>XYL</b>     | Xylene and more reactive aromatics                                                                                                                             |
| <b>OL2</b>     | Ethene                                                                                                                                                         |
| <b>OLT</b>     | Terminal alkenes                                                                                                                                               |
| <b>OLI</b>     | Internal alkenes                                                                                                                                               |
| <b>TOL</b>     | Toluene and less reactive aromatics                                                                                                                            |
| <b>CSL</b>     | Cresol and other hydroxy substituted aromatics                                                                                                                 |
| <b>HCHO</b>    | Formaldehyde                                                                                                                                                   |
| <b>ALD</b>     | Acetaldehyde and higher aldehydes                                                                                                                              |
| <b>KET</b>     | Ketones                                                                                                                                                        |
| <b>ORA2</b>    | Acetic acid and higher acids                                                                                                                                   |
| <b>NH3</b>     | Ammonia                                                                                                                                                        |
| <b>SULF</b>    | Sulfuric acid                                                                                                                                                  |
| <b>PM2.5</b>   | Particulate matter under 2.5 $\mu\text{m}$ diameter                                                                                                            |
| <b>PM10</b>    | Particulate matter under 10 $\mu\text{m}$ diameter                                                                                                             |
| <b>OC</b>      | Organic carbon                                                                                                                                                 |
| <b>BC</b>      | Black carbon                                                                                                                                                   |

**Table S3.** The area total anthropogenic emissions in Eastern China (27.7-40°N, 115-123°E), South Korea (34.5-38°N, 126-130°E), and Seoul Metropolitan Area (SMA: 37.2-37.8°N, 126.5-127.3°E) for each emission data set in May.

| <b>Region</b>       | <b>Eastern China</b> |             |             | <b>South Korea</b> |             |             | <b>SMA</b>  |             |             |
|---------------------|----------------------|-------------|-------------|--------------------|-------------|-------------|-------------|-------------|-------------|
| <b>Species</b>      | <b>EDV2</b>          | <b>EDV3</b> | <b>KOV5</b> | <b>EDV2</b>        | <b>EDV3</b> | <b>KOV5</b> | <b>EDV2</b> | <b>EDV3</b> | <b>KOV5</b> |
| <b>unit = mol/s</b> |                      |             |             |                    |             |             |             |             |             |
| <b>ISO*</b>         | 0.0                  | 0.0         | 31.3        | 0.0                | 0.0         | 2.5         | 0.0         | 0.0         | 0.1         |
| <b>SO2</b>          | 3627                 | 1991        | 1648        | 183                | 349         | 165         | 18          | 92          | 10          |
| <b>NO</b>           | 10063                | 9034        | 5482        | 990                | 1191        | 886         | 196         | 214         | 191         |
| <b>NO2</b>          | 0                    | 0           | 0           | 0                  | 0           | 0           | 0           | 0           | 0           |
| <b>CO</b>           | 52304                | 53183       | 48489       | 921                | 3004        | 2113        | 268         | 240         | 388         |
| <b>ETH</b>          | 519                  | 715         | 579         | 18                 | 16          | 30          | 5           | 5           | 6           |
| <b>HC3</b>          | 406                  | 542         | 545         | 60                 | 58          | 45          | 16          | 18          | 10          |
| <b>HC5</b>          | 508                  | 695         | 507         | 66                 | 65          | 36          | 18          | 20          | 8           |
| <b>HC8</b>          | 317                  | 435         | 534         | 53                 | 54          | 41          | 13          | 16          | 9           |
| <b>XYL</b>          | 176                  | 246         | 270         | 15                 | 16          | 41          | 4           | 4           | 9           |
| <b>OL2</b>          | 1144                 | 1599        | 1043        | 62                 | 59          | 73          | 16          | 17          | 14          |
| <b>OLT</b>          | 410                  | 573         | 352         | 30                 | 29          | 26          | 7           | 8           | 4           |
| <b>OLI</b>          | 118                  | 165         | 312         | 14                 | 13          | 27          | 3           | 4           | 6           |
| <b>TOL</b>          | 294                  | 410         | 810         | 27                 | 27          | 98          | 6           | 8           | 26          |
| <b>CSL</b>          | 176                  | 246         | 0           | 15                 | 16          | 0           | 4           | 4           | 0           |
| <b>HCHO</b>         | 96                   | 134         | 47          | 15                 | 16          | 9           | 4           | 5           | 2           |
| <b>ALD</b>          | 430                  | 599         | 41          | 34                 | 34          | 6           | 8           | 10          | 1           |
| <b>KET</b>          | 106                  | 144         | 43          | 7                  | 6           | 5           | 3           | 2           | 1           |
| <b>ORA2</b>         | 0                    | 0           | 0           | 0                  | 0           | 0           | 0           | 0           | 0           |
| <b>NH3</b>          | 4065                 | 6056        | 4594        | 80                 | 395         | 510         | 9           | 30          | 43          |
| <b>SULF</b>         | 0                    | 0           | 0           | 0                  | 0           | 0           | 0           | 0           | 0           |
| <b>unit = kg/s</b>  |                      |             |             |                    |             |             |             |             |             |
| <b>PM2.5</b>        | 98.8                 | 95.2        | 42.1        | 2.5                | 4.3         | 1.0         | 0.3         | 0.8         | 0.1         |
| <b>PM10</b>         | 142.3                | 133.2       | 96.7        | 3.6                | 6.6         | 7.3         | 0.4         | 1.3         | 1.1         |
| <b>OC</b>           | 18.0                 | 16.8        | 13.7        | 0.2                | 0.4         | 1.7         | 0.0         | 0.1         | 0.1         |
| <b>BC</b>           | 12.5                 | 11.6        | 8.5         | 0.7                | 0.5         | 0.6         | 0.1         | 0.1         | 0.1         |

\* Note ISO in Table S3 is only from anthropogenic sources. ISO is mainly emitted from biogenic sources using MEGAN.

**Table S4.** The chemical species of anthropogenic emissions used in RACM chemistry option and their mapping formulas from MOZART chemistry option that is the input format of *anthro\_emiss* program

| WRF-Chem | EDGAR-HTAP v2 (v3)                                                    | KORUS v5                                                                                                                                                 |
|----------|-----------------------------------------------------------------------|----------------------------------------------------------------------------------------------------------------------------------------------------------|
| RACM     | MOZART to RACM                                                        | SAPRC-99 to RACM                                                                                                                                         |
| ISO      | 0                                                                     | ISOP                                                                                                                                                     |
| SO2      | SO2                                                                   | SO2                                                                                                                                                      |
| NO       | NOx                                                                   | NO + NO2                                                                                                                                                 |
| NO2      | 0                                                                     | 0                                                                                                                                                        |
| CO       | CO                                                                    | CO                                                                                                                                                       |
| ETH      | C2H6 <sup>1)</sup>                                                    | ALK1 <sup>2)</sup>                                                                                                                                       |
| HC3      | 0.5*C2H5OH <sup>1)</sup> + CH3OH <sup>1)</sup> + C3H8 <sup>1)</sup>   | ALK2 <sup>2)</sup> + 1.11 × ALK3 <sup>2)</sup> + 0.4 × MEOH <sup>2)</sup>                                                                                |
| HC5      | 0.5 × BIGALK <sup>1)</sup> + 0.5 × C2H5OH <sup>1)</sup>               | 0.97*ALK4 <sup>2)</sup>                                                                                                                                  |
| HC8      | 0.5 × BIGALK <sup>1)</sup>                                            | ALK5 <sup>2)</sup>                                                                                                                                       |
| XYL      | 0.2 × TOLUENE <sup>1)</sup>                                           | ARO2 <sup>2)</sup>                                                                                                                                       |
| OL2      | C2H4 <sup>1)</sup>                                                    | ETHE <sup>2)</sup>                                                                                                                                       |
| OLT      | 0.3 × BIGENE <sup>1)</sup> + C3H6 <sup>1)</sup>                       | OLE1 + 0.5 × MACR + 0.5 × MVK                                                                                                                            |
| OLI      | 0.4 × BIGENE <sup>1)</sup>                                            | OLE2 <sup>2)</sup>                                                                                                                                       |
| TOL      | 0.1 × BIGENE <sup>1)</sup> + 0.3 × TOLUENE <sup>1)</sup>              | ARO1 <sup>2)</sup>                                                                                                                                       |
| CSL      | 0.2 × TOLUENE <sup>1)</sup>                                           | PHEN <sup>2)</sup> + CRES <sup>2)</sup>                                                                                                                  |
| HCHO     | CH2O                                                                  | HCHO                                                                                                                                                     |
| ALD      | 0.2 × BIGENE <sup>1)</sup> + CH3CHO <sup>1)</sup><br>+ 0.3 × TOLUENE* | CCHO <sup>2)</sup> + RCHO <sup>2)</sup> + BALD <sup>2)</sup> + GLY <sup>2)</sup><br>+ MGLY <sup>2)</sup> + BACL <sup>2)</sup> + 0.5 × MACR <sup>2)</sup> |
| KET      | CH3COCH3 <sup>1)</sup> + MEK <sup>1)</sup>                            | 0.3 × ACET <sup>2)</sup> + 1.61 × MEK <sup>2)</sup> + 1.61 × PRD2 <sup>2)</sup><br>+ 0.5 × MVK <sup>2)</sup> + IPRD <sup>2)</sup>                        |
| ORA2     | 0                                                                     | 0                                                                                                                                                        |
| NH3      | NH3                                                                   | NH3                                                                                                                                                      |
| PM2.5    | PM2.5                                                                 | PM2.5+PMFINE                                                                                                                                             |
| PM10     | PM10                                                                  | PM10                                                                                                                                                     |
| OC       | OC                                                                    | POA                                                                                                                                                      |
| SULF     | 0                                                                     | SULF                                                                                                                                                     |
| BC       | BC                                                                    | PEC                                                                                                                                                      |

<sup>1)</sup>Note that those are MOZRT VOC species (Emmons et al., 2010).

<sup>2)</sup>Note that those are SAPRC99 VOC species (Carter, 2000).

**Table S5.** Comparison of surface meteorological variables from SYNOP and WRF-Chem for the KORUS-AQ campaign period. N is the number of samples. R is correlation coefficient. RMSE is root-mean-square-error.

| Nation      |                   | Eastern China (sites = 271) |                       |                  | South Korea (sites = 48) |                       |                  |
|-------------|-------------------|-----------------------------|-----------------------|------------------|--------------------------|-----------------------|------------------|
| Variable    |                   | Temperature (°C)            | Relative humidity (%) | Wind speed (m/s) | Temperature (°C)         | Relative humidity (%) | Wind speed (m/s) |
|             | <b>N</b>          | 83698                       | 83696                 | 79595            | 14948                    | 14946                 | 14103            |
| <b>Mean</b> | <b>Obervation</b> | 20.13                       | 65.02                 | 2.87             | 18.94                    | 65.81                 | 2.56             |
|             | <b>WRF-Chem</b>   | 19.22                       | 65.35                 | 4.12             | 17.23                    | 71.35                 | 3.84             |
|             | <b>R</b>          | 0.90                        | 0.85                  | 0.55             | 0.88                     | 0.76                  | 0.62             |
|             | <b>Mean bias</b>  | -0.91                       | 0.32                  | 1.25             | -1.71                    | 5.54                  | 1.27             |
|             | <b>RMSE</b>       | 3.20                        | 13.94                 | 2.45             | 2.84                     | 15.88                 | 2.31             |



**Table S6.** The mapping table from WAS to RACM VOC based on Lu et al., 2013.

| <b>RACM</b> | <b>WAS</b>                                                                                                                   |
|-------------|------------------------------------------------------------------------------------------------------------------------------|
| TOL         | <b>Toluene</b> , Benzene, Ethylbenzene, i-Propylbenzene, n-Propylbenzene                                                     |
| XYL         | <b>m/p-Xylene</b> , <b>o-Xylene</b> , 1-3-5-Trimethylbenzene, 1-2-4-Trimethylbenzene, 1-2-3-Trimethylbenzene, 4-Ethyltoluene |
| ETE         | Ethene                                                                                                                       |
| ISO         | Isoprene                                                                                                                     |

**Table S7.** Comparison of the aircraft-based 1-minute-interval O<sub>3</sub>, NO<sub>2</sub>, CO, HCHO, TOL, XYL, ETE, and ISO observations with EDV2, EDV3, and KOV5 in SMA under 2 km height (unit = ppb). N is the number of samples. R is correlation coefficient. RMSE is root-mean-square-error.

| <b>Species</b>  | <b>Type</b> | <b>N</b> | <b>Mean</b> | <b>Bias</b> | <b><math>\sigma</math></b> | <b>R</b> |
|-----------------|-------------|----------|-------------|-------------|----------------------------|----------|
| O <sub>3</sub>  | <b>OBS</b>  | 1081     | 80.9        |             | 21.6                       |          |
|                 | <b>EDV2</b> |          | 64.0        | -16.9       | 16.3                       | 0.61     |
|                 | <b>EDV3</b> |          | 66.6        | -14.2       | 16.3                       | 0.63     |
|                 | <b>KOV5</b> |          | 62.7        | -18.1       | 15.4                       | 0.70     |
| NO <sub>2</sub> | <b>OBS</b>  | 1068     | 4.89        |             | 7.53                       |          |
|                 | <b>EDV2</b> |          | 5.33        | 0.44        | 7.28                       | 0.81     |
|                 | <b>EDV3</b> |          | 5.55        | 0.66        | 7.44                       | 0.80     |
|                 | <b>KOV5</b> |          | 5.34        | 0.46        | 7.56                       | 0.82     |
| CO              | <b>OBS</b>  | 1150     | 247         |             | 98                         |          |
|                 | <b>EDV2</b> |          | 148         | -98         | 53                         | 0.65     |
|                 | <b>EDV3</b> |          | 151         | -96         | 49                         | 0.67     |
|                 | <b>KOV5</b> |          | 145         | -102        | 49                         | 0.71     |
| HCHO            | <b>OBS</b>  | 1126     | 2.65        |             | 1.75                       |          |
|                 | <b>EDV2</b> |          | 1.89        | -0.76       | 1.24                       | 0.84     |
|                 | <b>EDV3</b> |          | 1.99        | -0.66       | 1.32                       | 0.82     |
|                 | <b>KOV5</b> |          | 1.86        | -0.78       | 1.26                       | 0.85     |
| TOL             | <b>OBS</b>  | 328      | 3.12        |             | 1.71                       |          |
|                 | <b>EDV2</b> |          | 0.63        | -2.49       | 0.43                       | 0.38     |
|                 | <b>EDV3</b> |          | 0.78        | -2.34       | 0.57                       | 0.36     |
|                 | <b>KOV5</b> |          | 2.24        | -0.88       | 1.47                       | 0.40     |
| XYL             | <b>OBS</b>  | 182      | 0.76        |             | 0.60                       |          |
|                 | <b>EDV2</b> |          | 0.31        | -0.46       | 0.25                       | 0.41     |
|                 | <b>EDV3</b> |          | 0.40        | -0.37       | 0.34                       | 0.41     |
|                 | <b>KOV5</b> |          | 0.64        | -0.12       | 0.51                       | 0.45     |
| ETE             | <b>OBS</b>  | 870      | 0.33        |             | 0.44                       |          |
|                 | <b>EDV2</b> |          | 0.79        | 0.46        | 0.90                       | 0.71     |
|                 | <b>EDV3</b> |          | 0.89        | 0.56        | 1.07                       | 0.73     |
|                 | <b>KOV5</b> |          | 0.69        | 0.35        | 0.71                       | 0.71     |
| ISO             | <b>OBS</b>  | 555      | 0.10        |             | 0.11                       |          |
|                 | <b>EDV2</b> |          | 0.28        | 0.17        | 0.27                       | 0.40     |
|                 | <b>EDV3</b> |          | 0.27        | 0.16        | 0.26                       | 0.40     |
|                 | <b>KOV5</b> |          | 0.26        | 0.16        | 0.26                       | 0.41     |

**Table S8.** Comparison of the aircraft-based 1-minute-interval O<sub>3</sub>, NO<sub>2</sub>, CO, HCHO, TOL, XYL, ETE, and ISO observations with EDV2, EDV3, and KOV5 in the Chungnam region under 2 km height (unit = ppb). N is the number of samples. R is correlation coefficient. RMSE is root-mean-square-error.

| Species         | Type | N   | Mean  | Bias  | $\sigma$ | R     |
|-----------------|------|-----|-------|-------|----------|-------|
| O <sub>3</sub>  | OBS  | 560 | 101.6 |       | 17.1     |       |
|                 | EDV2 |     | 63.5  | -38.1 | 14.3     | 0.10  |
|                 | EDV3 |     | 60.2  | -41.3 | 13.7     | 0.06  |
|                 | KOV5 |     | 62.4  | -39.2 | 14.1     | 0.11  |
| NO <sub>2</sub> | OBS  | 557 | 3.46  |       | 5.07     |       |
|                 | EDV2 |     | 4.88  | 1.43  | 4.75     | 0.26  |
|                 | EDV3 |     | 8.09  | 4.63  | 6.34     | 0.30  |
|                 | KOV5 |     | 4.79  | 1.34  | 4.79     | 0.28  |
| CO              | OBS  | 578 | 302   |       | 102      |       |
|                 | EDV2 |     | 148   | -153  | 49       | 0.51  |
|                 | EDV3 |     | 157   | -145  | 37       | 0.59  |
|                 | KOV5 |     | 142   | -159  | 34       | 0.61  |
| HCHO            | OBS  | 579 | 4.04  |       | 2.48     |       |
|                 | EDV2 |     | 2.25  | -1.79 | 1.06     | 0.41  |
|                 | EDV3 |     | 2.18  | -1.86 | 1.02     | 0.39  |
|                 | KOV5 |     | 2.49  | -1.55 | 1.19     | 0.44  |
| TOL             | OBS  | 130 | 2.65  |       | 2.36     |       |
|                 | EDV2 |     | 0.47  | -2.18 | 0.35     | 0.13  |
|                 | EDV3 |     | 0.50  | -2.15 | 0.35     | 0.09  |
|                 | KOV5 |     | 1.17  | -1.48 | 0.81     | -0.06 |
| XYL             | OBS  | 30  | 1.20  |       | 1.01     |       |
|                 | EDV2 |     | 0.11  | -1.10 | 0.09     | 0.01  |
|                 | EDV3 |     | 0.14  | -1.06 | 0.10     | 0.03  |
|                 | KOV5 |     | 0.17  | -1.03 | 0.21     | -0.42 |
| ETE             | OBS  | 255 | 2.08  |       | 4.64     |       |
|                 | EDV2 |     | 0.53  | -1.55 | 0.50     | 0.05  |
|                 | EDV3 |     | 0.59  | -1.49 | 0.48     | 0.06  |
|                 | KOV5 |     | 0.75  | -1.33 | 0.64     | 0.10  |
| ISO             | OBS  | 101 | 0.06  |       | 0.06     |       |
|                 | EDV2 |     | 0.06  | 0.00  | 0.06     | -0.17 |
|                 | EDV3 |     | 0.09  | 0.04  | 0.09     | -0.10 |
|                 | KOV5 |     | 0.06  | 0.00  | 0.06     | -0.13 |

**Table S9.** Comparison of the aircraft-based 1-minute-interval O<sub>3</sub>, NO<sub>2</sub>, CO, and HCHO observations with EDV2, EDV3, and KOV5 in each case distinguished by Chinese contribution to O<sub>3</sub> concentration under 2 km height (unit = ppb). N is the number of samples. R is correlation coefficient. RMSE is root-mean-square-error.

| Species         | Case                       | Type | N    | Mean | Bias  | $\sigma$ | R    |
|-----------------|----------------------------|------|------|------|-------|----------|------|
| O <sub>3</sub>  | Local<br>(5/4,20 , 6/2,3)  | OBS  | 1125 | 81.2 |       | 15.3     |      |
|                 |                            | EDV2 |      | 65.2 | -15.9 | 13.4     | 0.66 |
|                 |                            | EDV3 |      | 65.2 | -16.0 | 12.8     | 0.59 |
|                 |                            | KOV5 |      | 62.6 | -18.5 | 11.5     | 0.70 |
|                 | Transport<br>(5/25,26 ,31) | OBS  | 605  | 95.6 |       | 19.1     |      |
|                 |                            | EDV2 |      | 87.3 | -8.3  | 13.8     | 0.64 |
|                 |                            | EDV3 |      | 93.1 | -2.5  | 16.0     | 0.67 |
|                 |                            | KOV5 |      | 84.8 | -10.8 | 14.3     | 0.69 |
| NO <sub>2</sub> | Local<br>(5/4,20 , 6/2,3)  | OBS  | 1066 | 2.62 |       | 4.92     |      |
|                 |                            | EDV2 |      | 2.57 | -0.05 | 3.45     | 0.63 |
|                 |                            | EDV3 |      | 3.51 | 0.89  | 4.39     | 0.67 |
|                 |                            | KOV5 |      | 2.34 | -0.28 | 3.62     | 0.67 |
|                 | Transport<br>(5/25,26 ,31) | OBS  | 591  | 1.28 |       | 3.60     |      |
|                 |                            | EDV2 |      | 1.89 | 0.61  | 4.45     | 0.85 |
|                 |                            | EDV3 |      | 2.34 | 1.06  | 5.02     | 0.83 |
|                 |                            | KOV5 |      | 1.67 | 0.39  | 4.47     | 0.86 |
| CO              | Local<br>(5/4,20 , 6/2,3)  | OBS  | 1225 | 214  |       | 61.7     |      |
|                 |                            | EDV2 |      | 130  | -83   | 24.9     | 0.64 |
|                 |                            | EDV3 |      | 137  | -77   | 27.7     | 0.64 |
|                 |                            | KOV5 |      | 131  | -83   | 25.0     | 0.67 |
|                 | Transport<br>(5/25,26 ,31) | OBS  | 651  | 345  |       | 128.5    |      |
|                 |                            | EDV2 |      | 209  | -136  | 60.7     | 0.59 |
|                 |                            | EDV3 |      | 209  | -135  | 61.6     | 0.58 |
|                 |                            | KOV5 |      | 201  | -143  | 57.7     | 0.58 |
| HCHO            | Local<br>(5/4,20 , 6/2,3)  | OBS  | 1177 | 2.43 |       | 1.82     |      |
|                 |                            | EDV2 |      | 1.70 | -0.73 | 0.86     | 0.49 |
|                 |                            | EDV3 |      | 1.72 | -0.71 | 0.84     | 0.48 |
|                 |                            | KOV5 |      | 1.78 | -0.65 | 0.96     | 0.54 |
|                 | Transport<br>(5/25,26 ,31) | OBS  | 605  | 1.70 |       | 1.08     |      |
|                 |                            | EDV2 |      | 1.32 | -0.38 | 0.72     | 0.74 |
|                 |                            | EDV3 |      | 1.36 | -0.34 | 0.71     | 0.73 |
|                 |                            | KOV5 |      | 1.21 | -0.49 | 0.69     | 0.72 |

**Table S10.** Comparison of the aircraft-based 1-minute-interval TOL, XYL, ETE, and ISO observations with EDV2, EDV3, and KOV5 in each case distinguished by Chinese contribution to O<sub>3</sub> concentration under 2 km height. TOL, XYL, ETE, and ISO are defined in regional atmospheric chemical model (RACM) and compared with WAS based on Table S5 (unit = ppb). N is the number of samples. R is correlation coefficient. RMSE is root-mean-square-error.

| Species | Case                       | Type | N   | Mean | Bias  | $\sigma$ | R     |
|---------|----------------------------|------|-----|------|-------|----------|-------|
| TOL     | Local<br>(5/4,20 , 6/2,3)  | OBS  | 170 | 1.67 |       | 1.40     |       |
|         |                            | EDV2 |     | 0.35 | -1.32 | 0.25     | 0.22  |
|         |                            | EDV3 |     | 0.42 | -1.25 | 0.35     | 0.19  |
|         |                            | KOV5 |     | 1.14 | -0.53 | 1.00     | 0.03  |
|         | Transport<br>(5/25,26 ,31) | OBS  | 72  | 1.99 |       | 1.48     |       |
|         |                            | EDV2 |     | 0.49 | -1.50 | 0.37     | 0.54  |
|         |                            | EDV3 |     | 0.59 | -1.41 | 0.50     | 0.55  |
|         |                            | KOV5 |     | 1.64 | -0.35 | 1.42     | 0.57  |
| XYL     | Local<br>(5/4,20 , 6/2,3)  | OBS  | 77  | 0.76 |       | 0.85     |       |
|         |                            | EDV2 |     | 0.13 | -0.63 | 0.17     | 0.21  |
|         |                            | EDV3 |     | 0.18 | -0.58 | 0.24     | 0.23  |
|         |                            | KOV5 |     | 0.26 | -0.50 | 0.40     | 0.15  |
|         | Transport<br>(5/25,26 ,31) | OBS  | 30  | 0.70 |       | 0.42     |       |
|         |                            | EDV2 |     | 0.28 | -0.42 | 0.22     | 0.23  |
|         |                            | EDV3 |     | 0.37 | -0.33 | 0.30     | 0.24  |
|         |                            | KOV5 |     | 0.60 | -0.10 | 0.48     | 0.19  |
| ETE     | Local<br>(5/4,20 , 6/2,3)  | OBS  | 535 | 0.75 |       | 2.78     |       |
|         |                            | EDV2 |     | 0.44 | -0.30 | 0.51     | -0.01 |
|         |                            | EDV3 |     | 0.52 | -0.23 | 0.66     | 0.02  |
|         |                            | KOV5 |     | 0.49 | -0.26 | 0.49     | 0.09  |
|         | Transport<br>(5/25,26 ,31) | OBS  | 290 | 0.24 |       | 0.38     |       |
|         |                            | EDV2 |     | 0.37 | 0.13  | 0.60     | 0.65  |
|         |                            | EDV3 |     | 0.39 | 0.15  | 0.70     | 0.65  |
|         |                            | KOV5 |     | 0.31 | 0.06  | 0.51     | 0.65  |
| ISO     | Local<br>(5/4,20 , 6/2,3)  | OBS  | 352 | 0.08 |       | 0.09     |       |
|         |                            | EDV2 |     | 0.16 | 0.07  | 0.20     | 0.32  |
|         |                            | EDV3 |     | 0.17 | 0.09  | 0.20     | 0.31  |
|         |                            | KOV5 |     | 0.16 | 0.07  | 0.20     | 0.34  |
|         | Transport<br>(5/25,26 ,31) | OBS  | 76  | 0.10 |       | 0.10     |       |
|         |                            | EDV2 |     | 0.18 | 0.08  | 0.19     | 0.56  |
|         |                            | EDV3 |     | 0.19 | 0.08  | 0.18     | 0.58  |
|         |                            | KOV5 |     | 0.17 | 0.06  | 0.17     | 0.55  |

**Table S11.** Comparison of the aircraft-based 1-minute-interval O<sub>3</sub>, NO<sub>2</sub>, CO, HCHO, TOL, XYL, ETE, and ISO observations with EDV3\_Ch2 and EDV3\_ChKo2 in each case. The sampling number (N), mean, mean bias compared to DC-8 observations, standard deviations ( $\sigma$ ), and correlation coefficient (R) with observations are presented (unit = ppb).

| Species         | Case                       | Type       | N    | Mean  | Bias  | $\sigma$ | R    |
|-----------------|----------------------------|------------|------|-------|-------|----------|------|
| O <sub>3</sub>  | Local<br>(5/4,20 , 6/2,3)  | EDV3_Ch2   | 1125 | 68.5  | -12.7 | 12.3     | 0.6  |
|                 |                            | EDV3_ChKo2 |      | 72.3  | -8.9  | 14.3     | 0.68 |
|                 | Transport<br>(5/25,26 ,31) | EDV3_Ch2   | 605  | 111.0 | 15.4  | 23.4     | 0.65 |
|                 |                            | EDV3_ChKo2 |      | 112.6 | 17.0  | 23.1     | 0.66 |
| NO <sub>2</sub> | Local<br>(5/4,20 , 6/2,3)  | EDV3_Ch2   | 1066 | 3.30  | 0.68  | 4.31     | 0.7  |
|                 |                            | EDV3_ChKo2 |      | 3.05  | 0.44  | 3.95     | 0.67 |
|                 | Transport<br>(5/25,26 ,31) | EDV3_Ch2   | 591  | 2.09  | 0.81  | 4.75     | 0.83 |
|                 |                            | EDV3_ChKo2 |      | 1.92  | 0.64  | 4.17     | 0.84 |
| CO              | Local<br>(5/4,20 , 6/2,3)  | EDV3_Ch2   | 1225 | 158   | -56   | 43       | 0.7  |
|                 |                            | EDV3_ChKo2 |      | 176   | -38   | 53       | 0.65 |
|                 | Transport<br>(5/25,26 ,31) | EDV3_Ch2   | 651  | 331   | -13   | 122      | 0.56 |
|                 |                            | EDV3_ChKo2 |      | 339   | -6    | 122      | 0.56 |
| HCHO            | Local<br>(5/4,20 , 6/2,3)  | EDV3_Ch2   | 1177 | 1.82  | -0.61 | 0.87     | 0.5  |
|                 |                            | EDV3_ChKo2 |      | 2.13  | -0.30 | 1.17     | 0.51 |
|                 | Transport<br>(5/25,26 ,31) | EDV3_Ch2   | 605  | 1.78  | 0.08  | 0.98     | 0.69 |
|                 |                            | EDV3_ChKo2 |      | 1.94  | 0.24  | 1.33     | 0.72 |
| TOL             | Local<br>(5/4,20 , 6/2,3)  | EDV3_Ch2   | 170  | 0.46  | -2.33 | 0.40     | 0.1  |
|                 |                            | EDV3_ChKo2 |      | 0.79  | -2.00 | 0.65     | 0.18 |
|                 | Transport<br>(5/25,26 ,31) | EDV3_Ch2   | 72   | 0.68  | -2.20 | 0.46     | 0.50 |
|                 |                            | EDV3_ChKo2 |      | 1.14  | -1.75 | 0.90     | 0.55 |
| XYL             | Local<br>(5/4,20 , 6/2,3)  | EDV3_Ch2   | 77   | 0.19  | -0.64 | 0.25     | 0.2  |
|                 |                            | EDV3_ChKo2 |      | 0.31  | -0.52 | 0.42     | 0.23 |
|                 | Transport<br>(5/25,26 ,31) | EDV3_Ch2   | 30   | 0.35  | -0.43 | 0.30     | 0.22 |
|                 |                            | EDV3_ChKo2 |      | 0.61  | -0.17 | 0.53     | 0.23 |
| ETE             | Local<br>(5/4,20 , 6/2,3)  | EDV3_Ch2   | 535  | 0.62  | -0.13 | 0.92     | 0.0  |
|                 |                            | EDV3_ChKo2 |      | 0.87  | 0.12  | 1.17     | 0.00 |
|                 | Transport<br>(5/25,26 ,31) | EDV3_Ch2   | 290  | 0.51  | 0.26  | 0.69     | 0.65 |
|                 |                            | EDV3_ChKo2 |      | 0.74  | 0.50  | 1.22     | 0.67 |
| ISO             | Local<br>(5/4,20 , 6/2,3)  | EDV3_Ch2   | 352  | 0.17  | 0.08  | 0.20     | 0.3  |
|                 |                            | EDV3_ChKo2 |      | 0.15  | 0.06  | 0.17     | 0.33 |
|                 | Transport<br>(5/25,26 ,31) | EDV3_Ch2   | 76   | 0.16  | 0.06  | 0.16     | 0.57 |
|                 |                            | EDV3_ChKo2 |      | 0.14  | 0.03  | 0.14     | 0.55 |

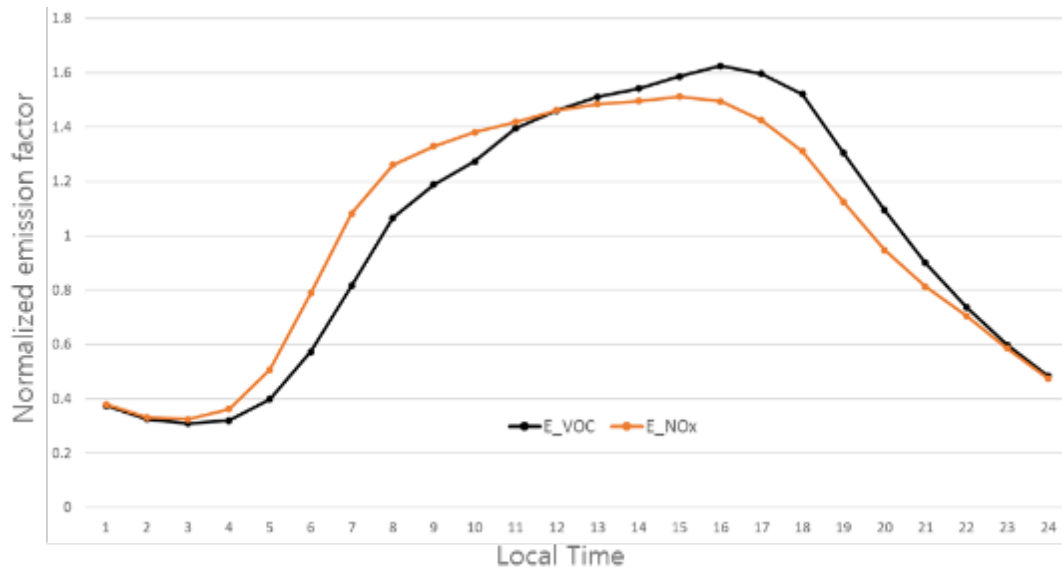

**Figure S1.** Diurnal emission factors of VOC and NO<sub>x</sub>.

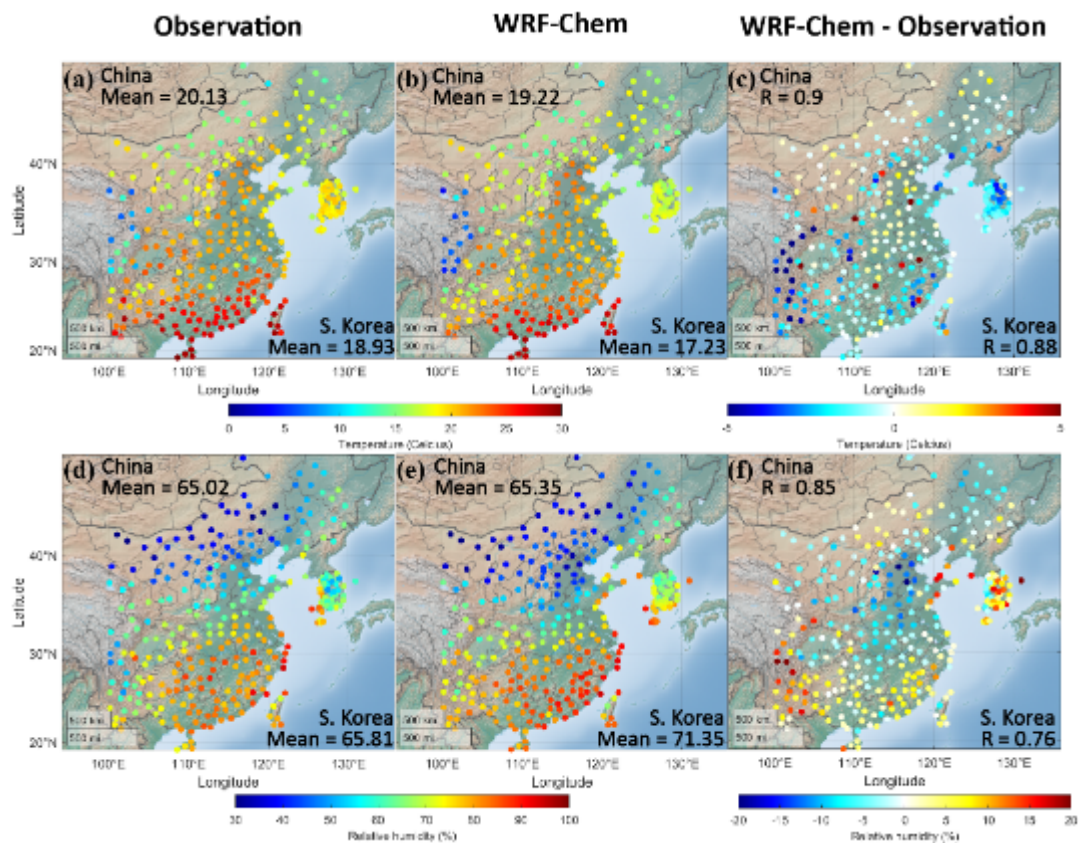

**Figure S2.** Averaged surface temperature (unit: °C) and relative humidity (unit: %) from (a, d) ground-based observations (SYNOP) and (b, e) the weather research and forecast (WRF) model coupled with chemistry (WRF-Chem) from 1st May to 10th June for each station and countries. The differences and correlation coefficients between averaged observations and WRF-Chem are shown (c, f).



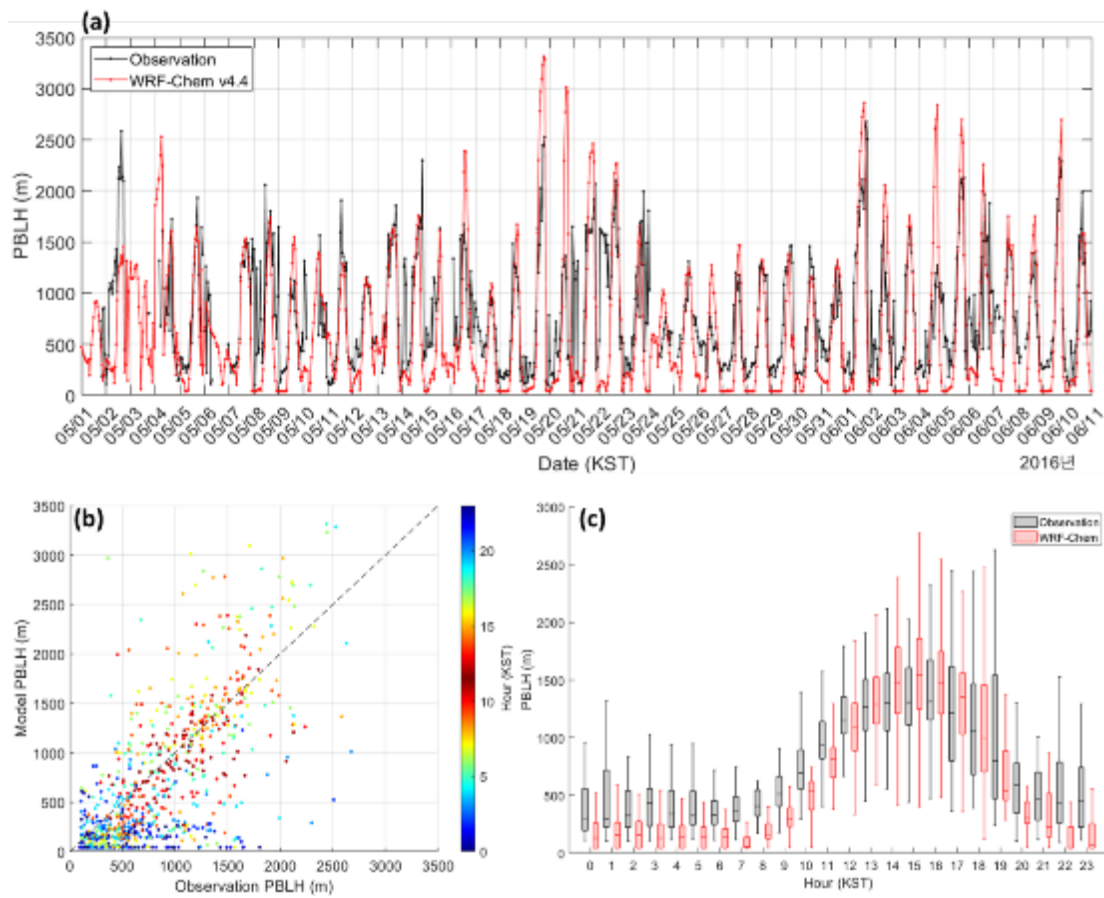

**Figure S3.** Comparison of PBL heights derived from the ceilometer at Yonsei University ( $37.564^{\circ}\text{N}$ ,  $126.935^{\circ}\text{E}$ ) with the WRF-Chem results during the KORUS-AQ campaign period: (a) time series of planetary boundary layer height from ceilometer and WRF-Chem (unit = m), (b) scatter plot of which x axis is ceilometer and y axis is WRF-Chem PBL height, (c) comparison of diurnal variations of PBL heights from ceilometer (grey) and WRF-Chem (red) with box whisker plot.

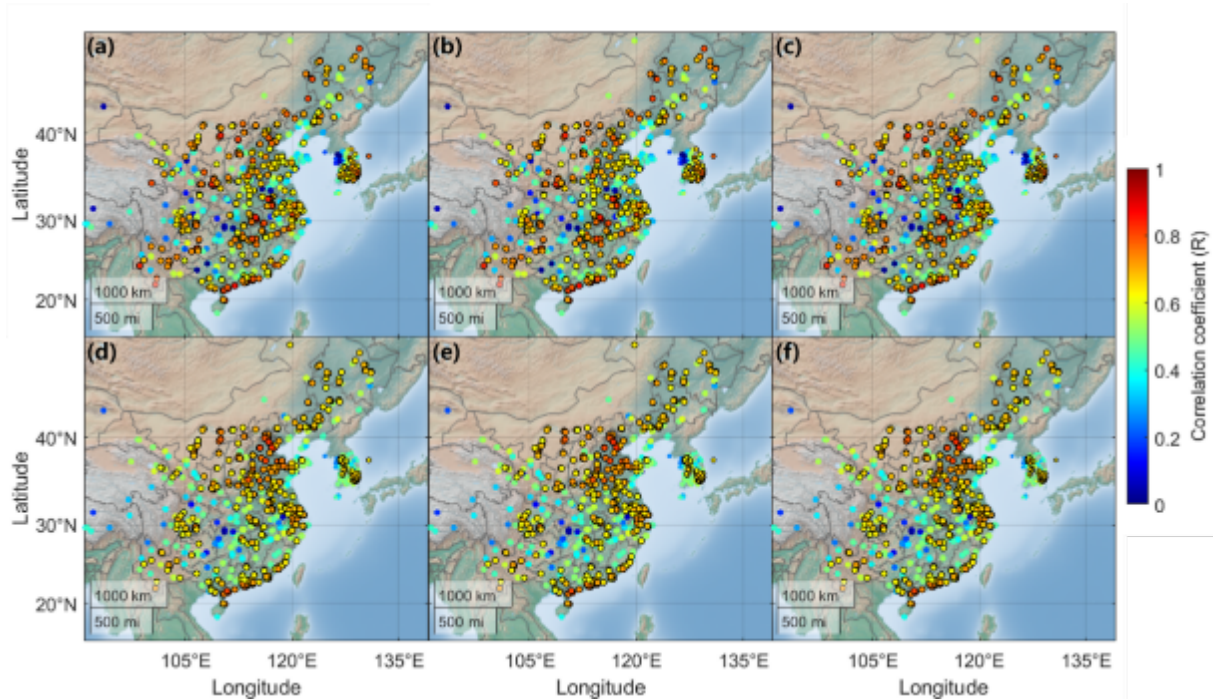

**Figure S4.** Correlation coefficient ( $R$ ) between observed and simulated (a-c) MDA8 O<sub>3</sub> and (d-f) hourly O<sub>3</sub> with (a, d) EDV2, (b, e) EDV3, and (c, f) KOV5 emissions. The observation sites with  $R$  greater than 0.6 are indicated by a black circle.

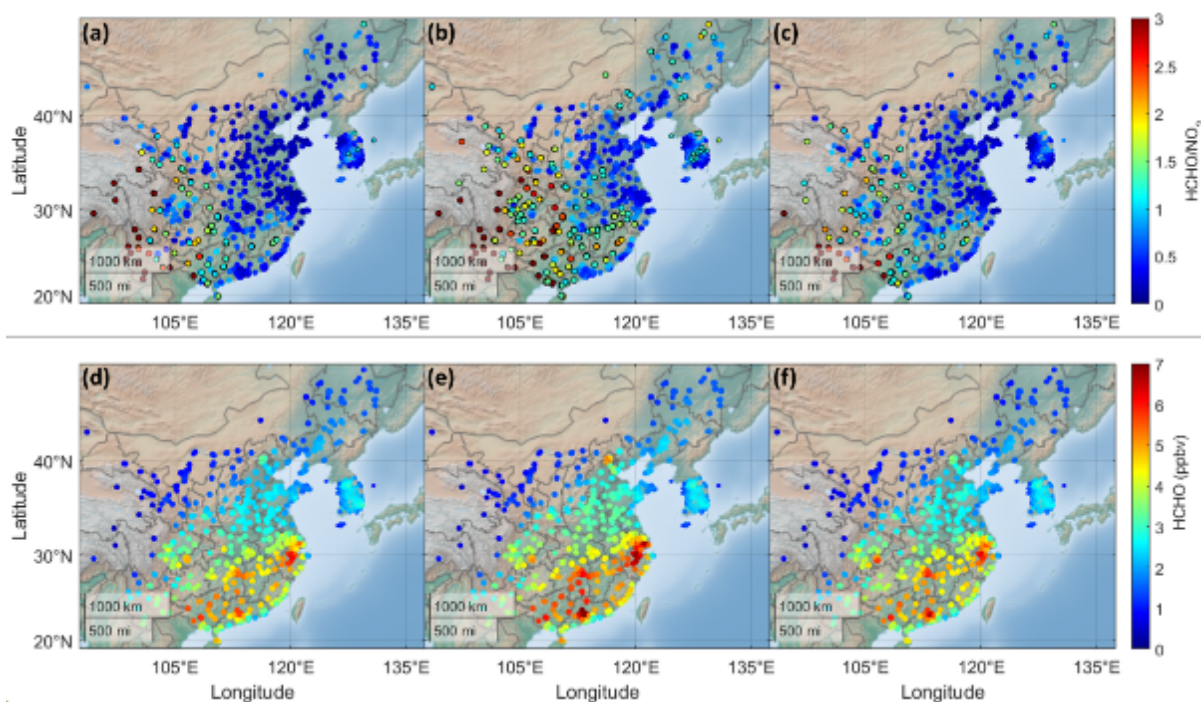

**Figure S5.** (a-c) Simulated surface HCHO to NO<sub>2</sub> ratio (FNR) and (d-f) HCHO concentrations with (a, d) EDV2, (b, e) EDV3, and (c, f) KOV5 emissions for 14-16 LST. FNR greater than 1 is marked with black circles. The simulated FNR and HCHO are linearly interpolated to ground-based observation sites.

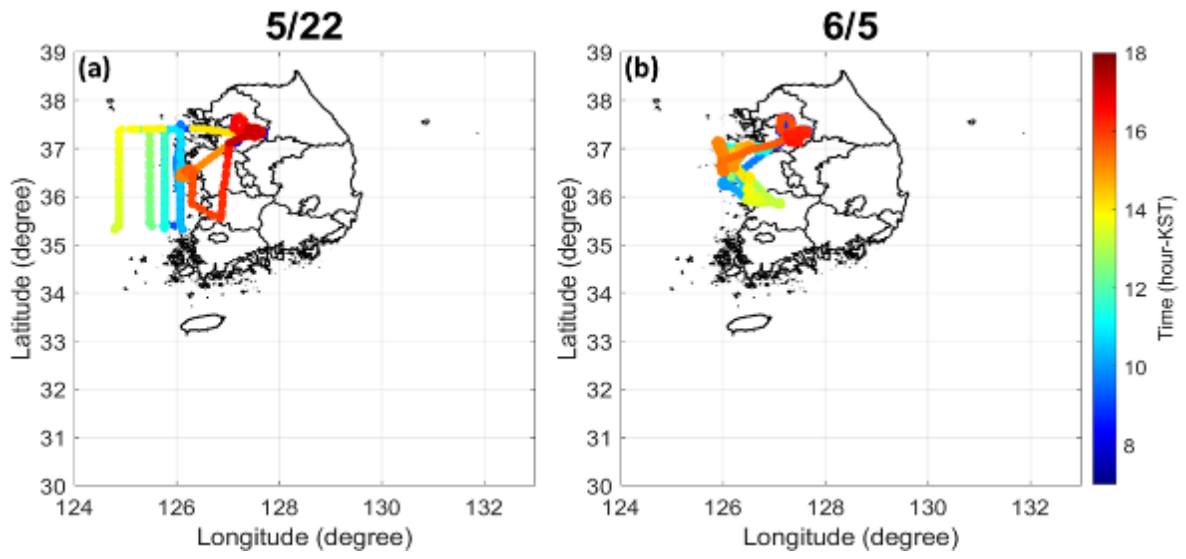

**Figure S6.** The DC-8 flight tracks on the 22nd May and 5th June.

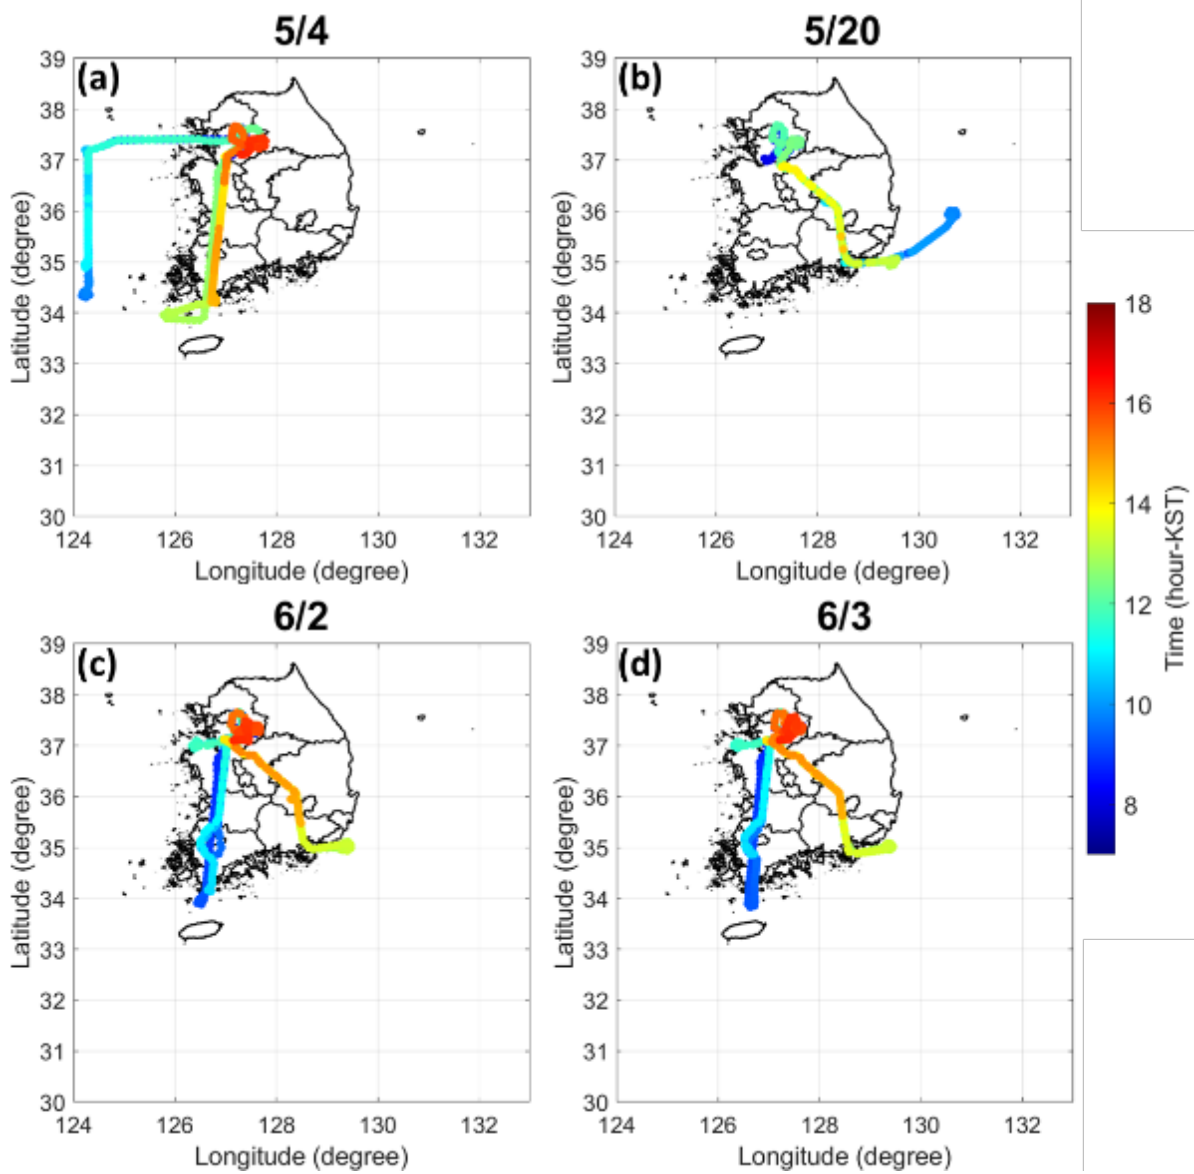

**Figure S7.** The DC-8 flight tracks on the 4th, 20th May and 2nd, 3rd June (Local case).

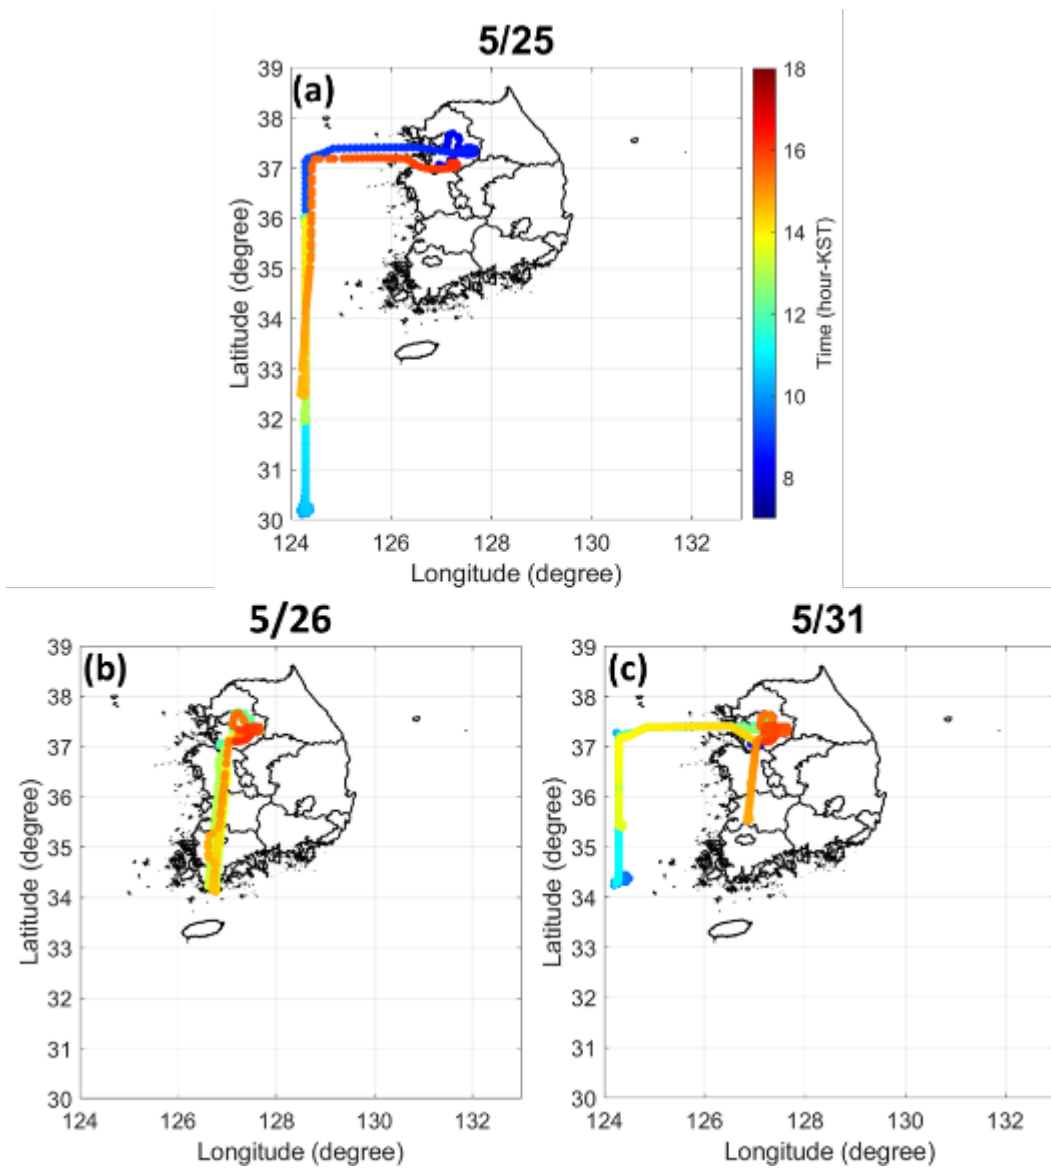

**Figure S8.** The DC-8 flight tracks on the 22nd, 27th, 31st May (Transport case).

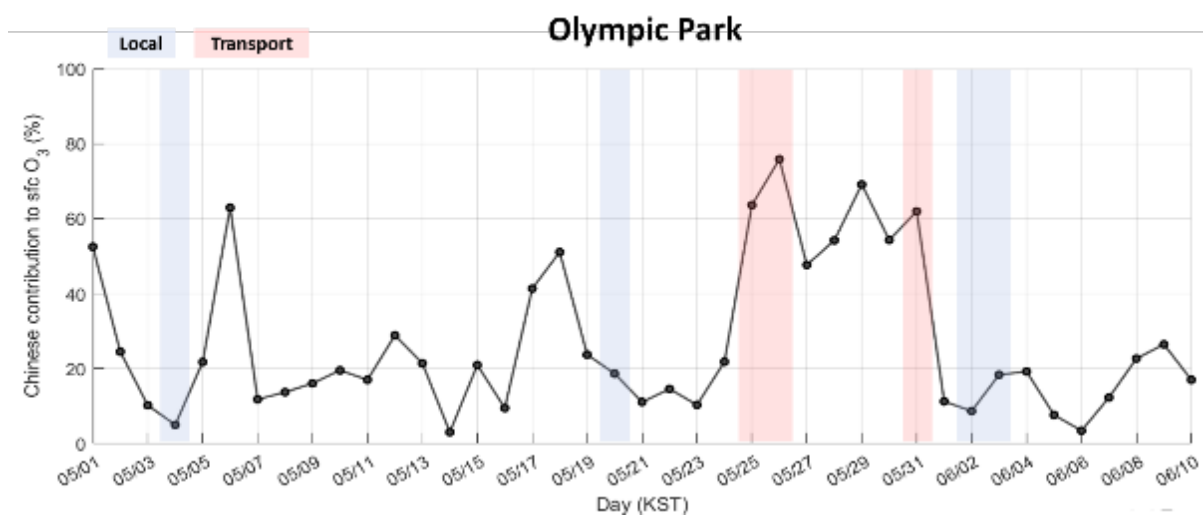

**Figure S9.** The contribution of Chinese emissions (%) to daily surface  $O_3$  concentrations at Olympic Park obtained from the EDV3 simulations with/without Chinese anthropogenic emissions.
